# Supplementary material for: Endogenous Testosterone and Exogenous Oxytocin Modulate Attentional Processing of Infant Faces
Source: PubMed Central journal article supplement (PMC5115757; doi:10.1371/journal.pone.0166617), 2016-11-18
Supplement: pone.0166617.s001.pdf [file pone.0166617.s001.pdf]

**S1 Table. Behavioral Data Study 1.**

## Reactiontime\_Data (ms)

| ID    | T_conc. | Target_adult_polar_bear | Target_baby_polar_bear | Target_adult_dog | Target_baby_dog | Target_adult_lion | Target_baby_lion |
|-------|---------|-------------------------|------------------------|------------------|-----------------|-------------------|------------------|
| 1.00  | 20.16   | 1326.28                 | 1534.85                | 1591.10          | 1477.53         | 1159.24           | 1241.11          |
| 2.00  | 22.98   | 1434.13                 | 1448.67                | 1498.55          | 1608.37         | 1246.36           | 1305.15          |
| 4.00  | 32.77   | 1552.28                 | 1674.44                | 1704.55          | 1708.38         | 1450.68           | 1496.10          |
| 5.00  | 12.29   | 1474.83                 | 1443.60                | 1595.10          | 1472.26         | 1300.01           | 1316.29          |
| 6.00  | 2.52    | 1684.39                 | 1731.69                | 1734.41          | 1701.56         | 1403.77           | 1439.37          |
| 7.00  | 7.04    | 1619.07                 | 1473.18                | 1630.41          | 1591.46         | 1280.47           | 1476.37          |
| 8.00  | 16.41   | 1238.39                 | 1479.68                | 1426.75          | 1525.68         | 1225.16           | 1454.14          |
| 9.00  | 9.58    | 1514.79                 | 1622.20                | 1424.31          |                 | 1364.33           | 1583.61          |
| 10.00 | 13.97   | 1435.56                 | 1379.03                | 1549.87          | 1471.44         | 1370.31           | 1358.15          |
| 11.00 | 2.08    | 1590.59                 | 1794.60                | 1796.52          | 1814.97         | 1566.02           | 1658.98          |
| 12.00 | 15.02   | 1348.03                 | 1263.89                | 1493.83          | 1343.91         | 1296.68           | 1166.82          |
| 14.00 | 9.24    | 1230.91                 | 1561.52                | 1309.08          | 1332.13         | 1238.79           | 1170.60          |
| 15.00 | 25.96   | 1420.69                 | 1569.40                | 1507.15          | 1574.03         | 1404.30           | 1487.56          |
| 17.00 | 38.13   | 1302.83                 | 1492.55                | 1565.25          | 1612.06         | 1139.63           | 1505.47          |
| 18.00 | 16.25   | 1536.37                 | 1543.09                | 1650.49          | 1150.60         | 1195.57           | 1429.68          |
| 19.00 | 13.24   | 1576.26                 | 1634.09                | 1634.39          | 1597.29         | 1398.88           | 1469.84          |
| 20.00 | 7.86    | 1632.86                 | 1690.87                | 1753.85          | 1736.95         | 1483.68           | 1577.54          |
| 21.00 | 13.11   | 1566.17                 | 1576.25                | 1703.30          | 1682.78         | 1327.50           | 1537.27          |
| 22.00 | 13.23   | 1584.24                 | 1681.33                | 1722.84          | 1786.16         | 1507.67           | 1689.24          |
| 24.00 | 23.57   | 1508.53                 | 1503.86                | 1566.43          | 1434.90         | 1348.82           | 1428.53          |

| ID    | Target_adult_woman | Target_baby_woman | Target_adult_man | Target_baby_man | Target_adult_orangutan | Target_baby_orangutan |
|-------|--------------------|-------------------|------------------|-----------------|------------------------|-----------------------|
| 1.00  | 1057.80            | 889.16            | 967.67           | 791.67          | 1334.82                | 1288.14               |
| 2.00  | 1178.15            | 1085.81           | 1048.66          | 861.67          | 1295.47                | 1283.55               |
| 4.00  | 1162.20            | 1234.20           | 1042.92          | 1097.89         | 1344.67                | 1431.80               |
| 5.00  | 1114.68            | 971.76            | 867.24           | 793.60          | 1279.54                | 1191.54               |
| 6.00  | 1294.85            | 1026.29           | 1195.56          | 936.79          | 1643.56                | 1388.50               |
| 7.00  | 1141.67            | 1017.95           | 1140.84          | 861.85          | 1352.03                | 1325.28               |
| 8.00  | 1095.21            | 1130.96           | 967.50           | 962.94          | 1545.98                | 1525.34               |
| 9.00  | 1376.20            | 1133.71           | 1260.45          | 1066.13         | 1545.50                | 1546.65               |
| 10.00 | 1053.62            | 1024.34           | 853.54           | 769.66          | 1201.04                | 1184.06               |
| 11.00 | 1430.63            | 1430.60           | 1282.80          | 1244.73         | 1548.49                | 1658.53               |
| 12.00 | 1058.73            | 1000.27           | 924.53           | 851.96          | 1451.46                | 1180.29               |
| 14.00 | 1024.86            | 1005.73           | 894.58           | 920.89          | 1289.31                | 1175.77               |
| 15.00 | 1249.27            | 1235.19           | 1055.14          | 1074.93         | 1487.14                | 1490.08               |
| 17.00 | 1109.17            | 1076.05           | 1015.10          | 940.57          | 1266.80                | 1335.45               |
| 18.00 | 1291.42            | 942.13            | 1007.84          | 846.37          | 1507.58                | 1433.93               |
| 19.00 | 1135.09            | 1081.01           | 1004.77          | 938.52          | 1553.02                | 1433.38               |
| 20.00 | 1397.88            | 1287.81           | 1257.86          | 1111.13         | 1512.46                | 1603.80               |
| 21.00 | 1222.10            | 1096.11           | 1126.41          | 982.72          | 1545.09                | 1355.92               |
| 22.00 | 1399.47            | 1284.34           | 1140.92          | 1129.16         | 1614.94                | 1633.16               |
| 24.00 | 1113.40            | 1051.55           | 985.86           | 905.30          | 1333.46                | 1338.97               |

| ID    | Target_adult_goat | Target_baby_goat | Delta_polar_bear | Delta_dog | Delta_lion | Delta_human_female | Delta_human_male | Delta_orangutan |
|-------|-------------------|------------------|------------------|-----------|------------|--------------------|------------------|-----------------|
| 1.00  | 1380.42           | 1354.82          | -208.57          | 113.57    | -81.87     | 168.65             | 176.00           | 46.68           |
| 2.00  | 1402.11           | 1287.54          | -14.53           | -109.82   | -58.79     | 92.34              | 186.99           | 11.93           |
| 4.00  | 1598.02           | 1598.94          | -122.16          | -3.83     | -45.42     | -72.00             | -54.97           | -87.12          |
| 5.00  | 1548.50           | 1355.38          | 31.24            | 122.84    | -16.27     | 142.92             | 73.64            | 87.99           |
| 6.00  | 1690.47           | 1629.88          | -47.31           | 32.85     | -35.61     | 268.56             | 258.77           | 255.06          |
| 7.00  | 1434.40           | 1451.21          | 145.89           | 38.95     | -195.90    | 123.71             | 278.99           | 26.75           |
| 8.00  | 1388.89           | 1467.13          | -241.29          | -98.93    | -228.99    | -35.75             | 4.56             | 20.64           |
| 9.00  | 1432.91           | 1517.13          | -107.41          |           | -219.28    | 242.50             | 194.32           | -1.16           |
| 10.00 | 1334.63           | 1233.50          | 56.54            | 78.43     | 12.16      | 29.28              | 83.89            | 16.98           |
| 11.00 | 1799.66           | 1663.89          | -204.01          | -18.45    | -92.96     | 0.03               | 38.07            | -110.03         |
| 12.00 | 1432.82           | 1248.86          | 84.14            | 149.91    | 129.86     | 58.47              | 72.57            | 271.18          |
| 14.00 | 1352.34           | 1200.48          | -330.61          | -23.05    | 68.19      | 19.13              | -26.30           | 113.54          |
| 15.00 | 1505.74           | 1493.62          | -148.71          | -66.89    | -83.26     | 14.07              | -19.79           | -2.94           |
| 17.00 | 1528.63           | 1501.61          | -189.72          | -46.81    | -365.85    | 33.12              | 74.53            | -68.65          |
| 18.00 | 1436.48           | 1386.23          | -6.72            | 499.89    | -234.11    | 349.29             | 161.47           | 73.65           |
| 19.00 | 1528.63           | 1463.98          | -57.83           | 37.10     | -70.96     | 54.08              | 66.25            | 119.64          |
| 20.00 | 1666.53           | 1576.26          | -58.01           | 16.90     | -93.86     | 110.07             | 146.74           | -91.35          |
| 21.00 | 1616.20           | 1582.38          | -10.08           | 20.52     | -209.77    | 126.00             | 143.69           | 189.17          |
| 22.00 | 1639.48           | 1602.91          | -97.09           | -63.33    | -181.57    | 115.13             | 11.75            | -18.23          |
| 24.00 | 1538.85           | 1495.60          | 4.66             | 131.53    | -79.71     | 61.85              | 80.56            | -5.51           |

| ID    | Delta_goat | Delta_all |
|-------|------------|-----------|
| 1.00  | 25.60      | 34.29     |
| 2.00  | 114.57     | 31.81     |
| 4.00  | -0.93      | -55.20    |
| 5.00  | 193.13     | 90.78     |
| 6.00  | 60.59      | 113.27    |
| 7.00  | -16.80     | 57.37     |
| 8.00  | -78.24     | -94.00    |
| 9.00  | -84.22     | 93.63     |
| 10.00 | 101.12     | 54.05     |
| 11.00 | 135.77     | -35.94    |
| 12.00 | 183.96     | 135.73    |
| 14.00 | 151.86     | -3.89     |
| 15.00 | 12.12      | -42.20    |
| 17.00 | 27.02      | -76.62    |
| 18.00 | 50.26      | 127.68    |
| 19.00 | 64.65      | 30.42     |
| 20.00 | 90.27      | 17.25     |
| 21.00 | 33.82      | 41.91     |
| 22.00 | 36.57      | -28.11    |
| 24.00 | 43.25      | 33.81     |
