# Supplementary material for: Endogenous Testosterone and Exogenous Oxytocin Modulate Attentional Processing of Infant Faces
Source: PubMed Central journal article supplement (PMC5115757; doi:10.1371/journal.pone.0166617), 2016-11-18
Supplement: pone.0166617.s002.pdf [file pone.0166617.s002.pdf]

## S2 Tabel. Behavioral Data Study 2.

### Reactiontime\_Data (ms)

| ID | T_conc. | Instruktion | Medikation | Distractor_Minus | Distractor_Neutral | Distractor_Plus | Target_Minus |
|----|---------|-------------|------------|------------------|--------------------|-----------------|--------------|
| 3  | 2.69    | placebo     | placebo    | 1024.13          | 968.05             | 1009.99         | 1108.88      |
| 4  | 26.53   | placebo     | oxytocin   | 1186.28          | 1221.51            | 1175.05         | 1172.47      |
| 5  | 11.73   | oxytocin    | placebo    | 1159.11          | 1163.46            | 1183.55         | 1249.63      |
| 6  | 6.86    | oxytocin    | oxytocin   | 1385.87          | 1315.52            | 1266.73         | 1292.62      |
| 10 | 3.20    | placebo     | oxytocin   | 859.19           | 901.71             | 825.68          | 829.72       |
| 11 | 63.48   | oxytocin    | placebo    | 1102.58          | 1095.24            | 1114.12         | 1164.54      |
| 13 | 24.30   | placebo     | placebo    | 1286.74          | 1227.98            | 1139.75         | 1263.60      |
| 14 | 10.99   | placebo     | placebo    | 1168.25          | 1157.27            | 1142.78         | 1216.63      |
| 18 | 22.42   | oxytocin    | placebo    | 1253.20          | 1141.53            | 1182.10         | 1195.36      |
| 19 | 22.27   | oxytocin    | placebo    | 1142.73          | 1107.10            | 1057.35         | 1150.35      |
| 20 | 40.79   | placebo     | placebo    | 1186.01          | 1155.71            | 1120.92         | 1269.95      |
| 21 | 5.82    | placebo     | oxytocin   | 989.13           | 1012.14            | 982.20          | 922.06       |
| 22 | 2.01    | placebo     | oxytocin   | 909.38           | 910.73             | 947.13          | 1018.10      |
| 23 | 5.44    | oxytocin    | placebo    | 1182.67          | 1123.03            | 1103.50         | 1196.93      |
| 24 | 2.97    | placebo     | placebo    | 1016.40          | 988.75             | 992.98          | 999.65       |
| 25 | 16.07   | placebo     | placebo    | 1338.80          | 1278.85            | 1262.08         | 1326.84      |
| 26 | .53     | placebo     | placebo    | 1159.53          | 1091.48            | 1067.55         | 1079.18      |
| 27 | 11.09   | oxytocin    | oxytocin   | 1277.99          | 1290.66            | 1292.40         | 1219.09      |
| 28 | 56.47   | oxytocin    | placebo    | 1256.89          | 1200.21            | 1238.55         | 1242.79      |
| 29 | 18.78   | placebo     | oxytocin   | 975.45           | 956.92             | 1016.35         | 1057.93      |
| 30 | 1.05    | oxytocin    | oxytocin   | 1273.61          | 1287.66            | 1273.03         | 1331.00      |
| 33 | 18.34   | placebo     | placebo    | 1382.52          | 1386.99            | 1430.30         | 1430.87      |
| 38 | 17.17   | oxytocin    | oxytocin   | 1181.90          | 1172.17            | 1116.50         | 1154.25      |
| 41 | 26.89   | oxytocin    | oxytocin   | 1025.88          | 1064.35            | 1166.61         | 1177.99      |
| 42 | 6.14    | oxytocin    | oxytocin   | 1089.90          | 1069.81            | 1013.90         | 1040.45      |
| 43 | 43.07   | placebo     | oxytocin   | 1064.25          | 1042.54            | 994.38          | 1220.73      |
| 45 | 21.21   | oxytocin    | placebo    | 1116.13          | 1080.10            | 1097.88         | 1111.88      |
| 46 | 13.23   | placebo     | oxytocin   | 1043.11          | 1039.75            | 932.85          | 1053.40      |
| 50 | 22.16   | oxytocin    | placebo    | 1193.40          | 1183.90            | 1139.68         | 1256.63      |
| 52 | 68.38   | oxytocin    | oxytocin   | 1204.10          | 1169.11            | 1154.28         | 1265.53      |
| 53 | 33.61   | oxytocin    | placebo    | 1226.90          | 1182.89            | 1138.90         | 1189.16      |
| 55 | 11.23   | oxytocin    | oxytocin   | 1207.35          | 1219.22            | 1140.38         | 1323.24      |
| 56 | 13.02   | oxytocin    | oxytocin   | 1092.97          | 982.35             | 1028.64         | 1080.34      |
| 57 | 7.57    | placebo     | oxytocin   | 1126.37          | 1044.98            | 1078.02         | 1104.91      |
| 58 | 7.92    | placebo     | placebo    | 1229.26          | 1175.42            | 1253.43         | 1246.60      |
| 61 | 4.23    | oxytocin    | oxytocin   | 1250.47          | 1178.25            | 1153.38         | 1263.20      |
| 62 | 13.98   | placebo     | oxytocin   | 1073.38          | 1077.01            | 1105.50         | 1057.85      |
| 70 | 32.48   | oxytocin    | placebo    | 1347.04          | 1394.20            | 1352.11         | 1478.04      |

| ID | Target_Neutral | Target_Plus | DeltaMinus | DeltaNeutral | DeltaPlus | Delta_all | TKonzSplit |
|----|----------------|-------------|------------|--------------|-----------|-----------|------------|
| 3  | 1090.08        | 1167.39     | -84.75     | -122.03      | -157.40   | -121.39   | .00        |
| 4  | 1356.19        | 1303.10     | 13.81      | -134.67      | -128.04   | -82.97    | 1.00       |
| 5  | 1267.47        | 1182.95     | -90.53     | -104.01      | .60       | -64.64    | .00        |
| 6  | 1263.75        | 1215.00     | 93.25      | 51.77        | 51.73     | 65.58     | .00        |
| 10 | 853.44         | 808.47      | 29.47      | 48.27        | 17.21     | 31.65     | .00        |
| 11 | 1195.59        | 1211.74     | -61.96     | -100.34      | -97.62    | -86.64    | 1.00       |
| 13 | 1240.10        | 1239.52     | 23.14      | -12.11       | -99.77    | -29.58    | 1.00       |
| 14 | 1223.53        | 1236.47     | -48.38     | -66.26       | -93.70    | -69.44    | .00        |
| 18 | 1188.61        | 1152.76     | 57.84      | -47.08       | 29.34     | 13.37     | 1.00       |
| 19 | 1109.46        | 1075.90     | -7.62      | -2.36        | -18.55    | -9.51     | 1.00       |
| 20 | 1319.42        | 1209.00     | -83.94     | -163.71      | -88.08    | -111.91   | 1.00       |
| 21 | 957.19         | 936.99      | 67.06      | 54.95        | 45.21     | 55.74     | .00        |
| 22 | 1025.59        | 959.50      | -108.73    | -114.87      | -12.38    | -78.66    | .00        |
| 23 | 1162.51        | 1175.03     | -14.26     | -39.48       | -71.53    | -41.75    | .00        |
| 24 | 1044.85        | 970.72      | 16.75      | -56.10       | 22.25     | -5.70     | .00        |
| 25 | 1311.36        | 1371.93     | 11.96      | -32.51       | -109.85   | -43.47    | 1.00       |
| 26 | 1029.48        | 1052.43     | 80.35      | 62.01        | 15.13     | 52.49     | .00        |
| 27 | 1293.73        | 1287.33     | 58.90      | -3.07        | 5.07      | 20.30     | .00        |
| 28 | 1401.45        | 1298.15     | 14.10      | -201.25      | -59.60    | -82.25    | 1.00       |
| 29 | 986.32         | 978.58      | -82.48     | -29.40       | 37.78     | -24.70    | 1.00       |
| 30 | 1313.95        | 1256.08     | -57.39     | -26.29       | 16.95     | -22.25    | .00        |
| 33 | 1443.28        | 1360.78     | -48.34     | -56.28       | 69.52     | -11.70    | 1.00       |
| 38 | 1116.35        | 1118.54     | 27.65      | 55.82        | -2.04     | 27.15     | 1.00       |
| 41 | 1190.85        | 1185.40     | -152.11    | -126.50      | -18.79    | -99.13    | 1.00       |
| 42 | 1068.85        | 1052.65     | 49.45      | .96          | -38.75    | 3.89      | .00        |
| 43 | 1157.71        | 1171.73     | -156.48    | -115.17      | -177.34   | -149.66   | 1.00       |
| 45 | 1168.93        | 1134.30     | 4.25       | -88.82       | -36.43    | -40.33    | 1.00       |
| 46 | 1109.49        | 1110.79     | -10.29     | -69.74       | -177.94   | -85.99    | .00        |
| 50 | 1244.85        | 1225.23     | -63.22     | -60.95       | -85.55    | -69.91    | 1.00       |
| 52 | 1273.61        | 1205.18     | -61.43     | -104.51      | -50.89    | -72.28    | 1.00       |
| 53 | 1239.23        | 1177.83     | 37.74      | -56.34       | -38.92    | -19.17    | 1.00       |
| 55 | 1270.61        | 1260.18     | -115.89    | -51.40       | -119.80   | -95.69    | .00        |
| 56 | 1123.25        | 1086.86     | 12.63      | -140.90      | -58.22    | -62.16    | .00        |
| 57 | 1262.92        | 1222.70     | 21.46      | -217.94      | -144.68   | -113.72   | .00        |
| 58 | 1313.43        | 1251.13     | -17.34     | -138.01      | 2.29      | -51.02    | .00        |
| 61 | 1354.45        | 1224.47     | -12.73     | -176.20      | -71.09    | -86.67    | .00        |
| 62 | 1192.13        | 1098.20     | 15.53      | -115.11      | 7.30      | -30.76    | 1.00       |
| 70 | 1466.26        | 1493.41     | -131.00    | -72.06       | -141.30   | -114.79   | 1.00       |
